# Supplementary material
Source: publisher site journal article supplement (https://www.dovepress.com/article/456109)
Supplement: Supplementary file 1 [file get_supplementary_file.php]

**Appendices**

**Appendix 1: Algorithm 1- C1 Generation**

**Input:** Data set with complaints as rows

**Output:** Candidate set C1

Take an empty list C;

For every *complaint* in data set do:

For every *word* in complaint do:

if *word* not in C then:

add the *word* to C;

end if;

end for;

end for;

Sort C in alphabetical order;

Take an empty list C1;

for each *item* in C do:

create a singleton set S using the item;

add S to C1;

end for;

**Appendix 2: Algorithm 2- Ck Generation**

**Input:** Lk-1, k

**Output:** Candidate set C1

Take an empty list Ck;

len ← length of Lk-1;

for i← 0 to len-1:

for j← i+1 to len-1:

L1← first k-2 items of Lk-1[i];

L2← first k-2 items of Lk-1[j];

sort L1;

sort L2;

if L1==L2:

L= L1 ∪ L2;

add L to Ck;

end if;

end for;

end for;

**Appendix 3: Algorithm 3-Lk Generation**

**Input:** Dataset**,** Ck, minimum support

**Output:** Lk with support count

Count← empty dictionary;

for complaint in dataset:

Complaints ← Set(complaint);

for candidate in Ck:

if candidate is subset of Complaints:

itemset← FrozenSet(candidate);

if itemset not in Count:

Count[itemset]←1;

else:

Count[itemset]← Count[itemset]+1;

end if;

end if;

end for;

end for;

N← total number of complaints;

Support← empty dictionary;

Lk ← empty list;

for itemset in Count:

support← Count[itemset]/N;

if support > minimum support:

add itemset to Lk;

Support[itemset]← support;

end if;

end for;

**Appendix 4: Algorithm 4- Association Rule Mining**

**Input:** Frequent itemsets

**Output:** Association rules with the antecedent, consequent, and confidence.

Create an empty set named rules;

for subset1 in itemset:

for subset2 in itemset: #here subset1 and subset2 are mutually exclusive.

support1 ← support of subset1;

support2 ← support of subset2;

support3 ← support of subset1∪ subset2;

ratio1=support3/support1;

ratio2=support3/support2;

if ratio1 >=0.7:

rule=(antecedent=subset1, consequent=subset2, confidence=ratio1);

add rule to rules;

end if;

if ratio2 >=0.7:

rule=(antecedent=subset2, consequent=subset1, confidence=ratio2);

add rule to rules;

end if;

end for;

end for;
